# Supplementary material
Source: PubMed Central journal article supplement (PMC3951662)
Supplement: NIHMS552016-supplement-01.pdf [file NIHMS552016-supplement-01.pdf]

**Supplementary Methods*****Neuron and glial cell isolation and culture***

Purity of the different populations was determined before culture by immunofluorescence: microglia cultures were >95% Iba1<sup>+</sup>, astrocyte cultures were >99% GFAP<sup>+</sup> and cultures of oligodendrocyte precursors were >85% Olig-2<sup>+</sup>. Our neuron-glia co-cultures consisted of 27±2% neurons, 44±2% astrocytes, and 9±2% microglia (mean±SEM).

Microglia and astrocytes were cultured in DMEM/2% FBS or activated with LPS (0.1 µg/ml) or LPS (0.1 µg/ml) plus IFN $\gamma$  (500 U/ml) in the absence or presence of 100 nM adrenomedullin. Oligodendrocyte precursors were incubated in serum-free DMEM/Nutrient Mixture F-12 (Gibco) supplemented with Apo-transferrin (25 µg/ml), biotin (10 nM), sodium selenite (30 nM), putrescine (1 µg/ml), insulin (5 µg/ml), hydrocortisone (20 nM), progesterone (20 nM), penicillin (100 U/ml), streptomycin (100 mg/ml), basic fibroblast growth factor (5 ng/ml), platelet-derived growth factor (5 ng/ml) and BSA (0.1%). Mature oligodendrocytes were generated by incubation of oligodendrocyte precursors with T3 hormone (30 nM) for 3-5 days. Oligodendrocyte cell death was caused by oxidative stress after incubation with 200 µM H<sub>2</sub>O<sub>2</sub> in the absence or presence of 100 nM adrenomedullin and cell survival was assayed by the reduction of MTT after 24 h of culture.

Neuron-glia co-cultures (5 x 10<sup>5</sup> cells/ml) were incubated in DMEM/10% FBS or stimulated with LPS (0.1 µg/ml) in the absence or presence of 100 nM adrenomedullin and expression of neurotrophic factors was determined by real time PCR as described below in RNA samples isolated after 6 h of culture.

**Supplementary Table 1. Primers and temperatures of annealing used in the real time RT-PCR assays.**

| Genes               | Accession n°   | Primer sequence                     |                                     | T <sub>m</sub> |
|---------------------|----------------|-------------------------------------|-------------------------------------|----------------|
|                     |                | sense                               | anti sense                          |                |
| BDNF                | NM_001048141.1 | 5'- CCC TCC CCC TTT TAA CTG AA - 3' | 5'- GCC TTC ATG CAA CCG AAG TA - 3' | 58°C           |
| ADNP                | NM_009628.2    | 5'- AGA AAA GCC CGG AAA ACT GT - 3' | 5'- AAG CAC TGC AGC AAA AAG GT - 3' | 50°C           |
| <i>Housekeeping</i> |                |                                     |                                     |                |
| Actin               | NM_007393.3    | 5'- TGT TAC CAA CTG GGA CGA CA - 3' | 5'- GGG GTG TTG AAG GTC TCA AA - 3' | 58°C           |

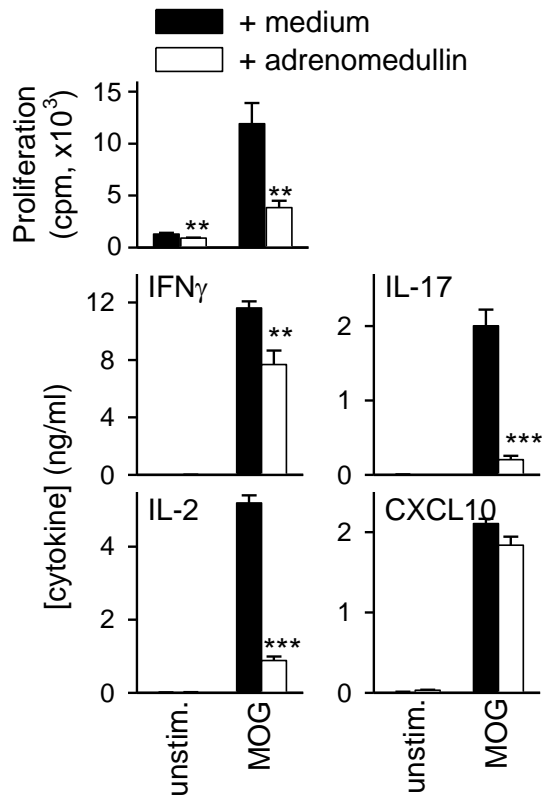

**Supplementary Figure 1.** Adrenomedullin deactivates encephalitogenic T-cell responses *in vitro*. Cytokine production by spleen/DLN cells isolated from EAE mice (peak of disease) and restimulated ex vivo with MOG in the absence (medium) or presence of adrenomedullin (100 nM). n=5-6 mice/group, two independent experiments. \*p<0.05; \*\*p<0.01; \*\*\*p<0.001 vs control with Mann-Whitney test.

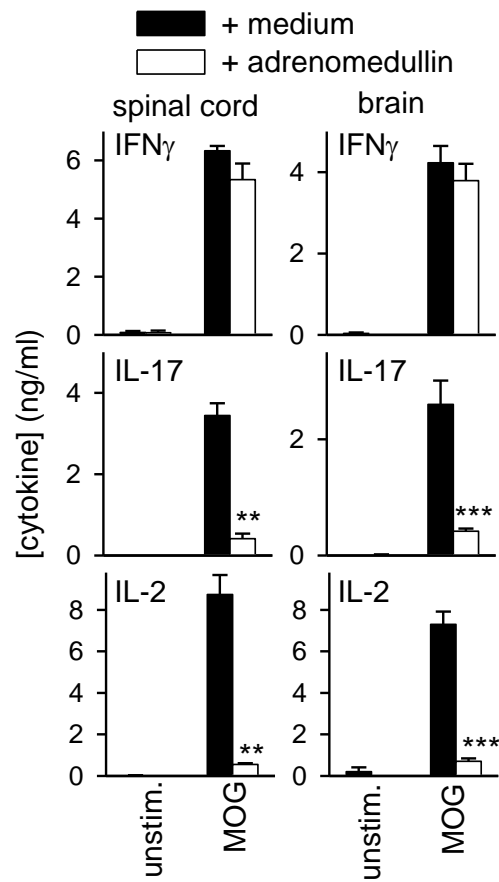

**Supplementary Figure 2.** Cytokine production by spinal cord and brain mononuclear cells isolated from EAE mice at peak of the disease and restimulated with MOG<sub>35-55</sub> in the absence (medium) or presence of adrenomedullin (100 nM). n=8 mice/group, two independent experiments. \*\*p<0.01; \*\*\*p<0.001 vs control with Mann-Whitney test.

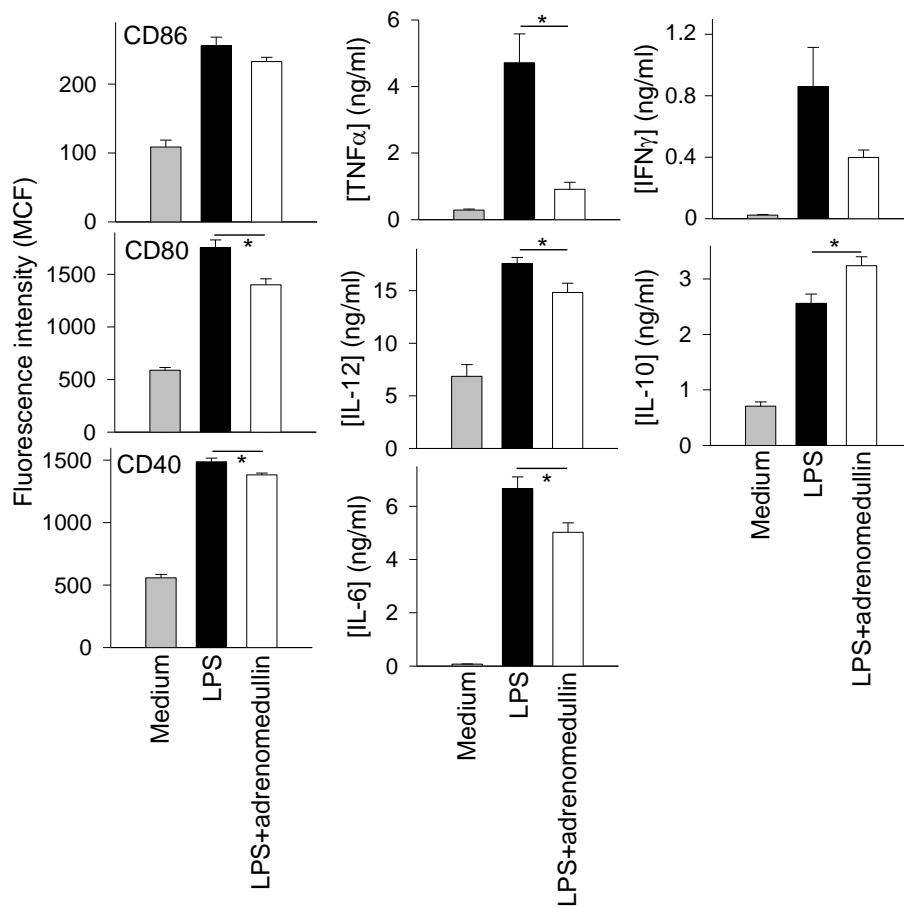

**Supplementary Figure 3.** Expression of costimulatory molecules and production of cytokines by DCs cultured with medium or matured/activated with LPS in the absence or presence of adrenomedullin (100 nM). MCF: mean channel fluorescence. n=3, in duplicate. \*p<0.05 vs control with Mann-Whitney test.

FIGURE 1A

| Days for comparison<br>(control vs adrenomedullin) | P-values        |                   |               |
|----------------------------------------------------|-----------------|-------------------|---------------|
|                                                    | unpaired T Test | Mann-Whitney Test | Two way ANOVA |
| 20                                                 | 0.0033 (**)     | 0.0104 (*)        | < 0.05 (*)    |
| 21                                                 | 0.0018 (**)     | 0.0050 (**)       | <0.01 (**)    |
| 22                                                 | 0.0016 (**)     | 0.0040 (**)       | <0.01 (**)    |
| 23                                                 | 0.0025 (**)     | 0.0055 (**)       | <0.01 (**)    |
| 24                                                 | 0.0002 (***)    | 0.001 (***)       | <0.001 (***)  |
| 25                                                 | 0.0037 (**)     | 0.0052 (**)       | < 0.05 (*)    |
| 26                                                 | 0.0041 (**)     | 0.0043 (**)       | < 0.05 (*)    |
| 28                                                 | <0.0001 (***)   | 0.0003 (***)      | <0.001 (***)  |
| 30                                                 | <0.0001 (***)   | <0.0001 (***)     | <0.001 (***)  |
| 34                                                 | <0.0001 (***)   | <0.0001 (***)     | <0.001 (***)  |
| 37                                                 | <0.0001 (***)   | <0.0001 (***)     | <0.001 (***)  |
| 42                                                 | <0.0001 (***)   | <0.0001 (***)     | <0.001 (***)  |
| 48                                                 | <0.0001 (***)   | <0.0001 (***)     | <0.001 (***)  |
| 52                                                 | <0.0001 (***)   | <0.0001 (***)     | <0.001 (***)  |
| 56                                                 | <0.0001 (***)   | <0.0001 (***)     | <0.001 (***)  |
| 59                                                 | <0.0001 (***)   | <0.0001 (***)     | <0.001 (***)  |

FIGURE 1B

| Days for comparison<br>(control vs adrenomedullin) | P-values        |                   |               |
|----------------------------------------------------|-----------------|-------------------|---------------|
|                                                    | unpaired T Test | Mann-Whitney Test | Two way ANOVA |
| 15                                                 | 0.2977 (ns)     | 0.2156 (ns)       | > 0.05 (ns)   |
| 16                                                 | 0.011 (*)       | 0.011 (*)         | > 0.05 (ns)   |
| 18                                                 | 0.0002 (***)    | 0.0003 (***)      | < 0.05 (*)    |
| 19                                                 | 0.0004 (***)    | 0.0007 (***)      | < 0.05 (*)    |
| 20                                                 | <0.0001 (***)   | <0.0001 (***)     | <0.001 (***)  |
| 21                                                 | <0.0001 (***)   | <0.0001 (***)     | <0.001 (***)  |
| 22                                                 | <0.0001 (***)   | <0.0001 (***)     | <0.001 (***)  |
| 23                                                 | <0.0001 (***)   | <0.0001 (***)     | <0.001 (***)  |
| 24                                                 | <0.0004 (***)   | <0.0002 (***)     | <0.001 (***)  |
| 27                                                 | <0.0004 (***)   | <0.0006 (***)     | <0.001 (***)  |
| 30                                                 | <0.0001 (***)   | <0.0002 (***)     | <0.001 (***)  |
| 34                                                 | <0.0002 (***)   | <0.0007 (***)     | <0.001 (***)  |
| 38                                                 | <0.0001 (***)   | <0.0001 (***)     | <0.001 (***)  |
| 43                                                 | <0.0001 (***)   | <0.0001 (***)     | <0.001 (***)  |
| 48                                                 | <0.0001 (***)   | <0.0001 (***)     | <0.001 (***)  |
| 52                                                 | <0.0001 (***)   | <0.0001 (***)     | <0.001 (***)  |

FIGURE 1C

| Days for comparison | unpaired T Test | Mann-Whitney Test | Two way ANOVA |
|---------------------|-----------------|-------------------|---------------|
|---------------------|-----------------|-------------------|---------------|

(control vs adrenomedullin)

|    |               |               |               |
|----|---------------|---------------|---------------|
| 11 | 0.3765 (ns)   | 0.3937 (ns)   | > 0.05 (ns)   |
| 12 | 0.0875 (ns)   | 0.0706 (ns)   | > 0.05 (ns)   |
| 13 | 0.2924 (ns)   | 0.2077 (ns)   | > 0.05 (ns)   |
| 14 | 0.1001 (ns)   | 0.0589 (ns)   | > 0.05 (ns)   |
| 15 | 0.0691 (ns)   | 0.0718 (ns)   | > 0.05 (ns)   |
| 16 | 0.0454 (*)    | 0.0462 (*)    | > 0.05 (ns)   |
| 17 | 0.2323 (ns)   | 0.2417 (ns)   | > 0.05 (ns)   |
| 18 | 0.0893 (ns)   | 0.105 (ns)    | > 0.05 (ns)   |
| 20 | 0.0470 (*)    | 0.0784 (ns)   | > 0.05 (ns)   |
| 21 | 0.0120 (*)    | 0.0152 (*)    | > 0.05 (ns)   |
| 23 | 0.0158 (*)    | 0.0175 (*)    | <0.0001 (***) |
| 26 | <0.0001 (***) | <0.0002 (***) | <0.0001 (***) |
| 27 | <0.0027 (**)  | <0.0032 (**)  | <0.0001 (***) |
| 31 | <0.0001 (***) | <0.0001 (***) | <0.0001 (***) |
| 36 | <0.0001 (***) | <0.0001 (***) | <0.0001 (***) |
| 44 | <0.0001 (***) | <0.0001 (***) | <0.0001 (***) |

FIGURE 1D

|                               | One way ANOVA | Kruskal Wallis Test |
|-------------------------------|---------------|---------------------|
| c vs adrenom EAE score of 0.5 | <0.0001 (***) | <0.0001 (***)       |
| c vs adrenom EAE score of 1.5 | <0.0001 (***) | <0.0001 (***)       |
| c vs adrenom EAE score of >2  | <0.0001 (***) | < 0.01 (**)         |

FIGURE 3

Tissue cytokine comparison  
(control vs adrenomedullin)

P-value unpaired T Test P value Mann-Whitney Test

|              |              |             |
|--------------|--------------|-------------|
| IFN $\gamma$ | 0.0017 (**)  | 0.0357 (**) |
| IL-2         | 0.2505 (ns)  | 0.7857 (ns) |
| IL-17        | 0.2278 (ns)  | 0.1337 (ns) |
| GM-CSF       | 0.02 (*)     | 0.0357 (*)  |
| OPN          | 0.0122 (*)   | 0.0357 (*)  |
| IL-6         | 0.0150 (*)   | 0.0333 (*)  |
| CXCL10       | 0.0004 (***) | 0.0357 (*)  |
| CCL5         | 0.0001 (***) | 0.0357 (*)  |
| CCL2         | 0.003 (**)   | 0.0364 (*)  |



FIGURE 4A

| Cytokine/proliferation<br>(control vs adrenomedullin) | P value T-test | P value Mann-Whitney Test |
|-------------------------------------------------------|----------------|---------------------------|
| IL-17 (stimuli: MOG)                                  | <0.001 (***)   | 0.001 (***)               |
| IFN $\gamma$ (stimuli: MOG)                           | <0.0062 (**)   | 0.0249 (*)                |
| IL-2 (stimuli: MOG)                                   | 0.0001 (***)   | 0.001 (***)               |
| GM-CSF (stimuli: MOG)                                 | 0.0012 (**)    | 0.05 (*)                  |
| OPN (stimuli: MOG)                                    | 0.0372 (*)     | 0.05 (*)                  |
| proliferation (stimuli: MOG)                          | <0.001 (***)   | 0.0022 (**)               |
| IL-17 (stimuli: ConA)                                 | 0.0301 (*)     | 0.0741 (ns)               |
| IFN $\gamma$ (stimuli: ConA)                          | 0.0084 (**)    | 0.0383 (*)                |
| IL-2 (stimuli: ConA)                                  | 0.176 (ns)     | 0.5 (ns)                  |
| GM-CSF (stimuli: ConA)                                | 0.2965 (ns)    | 0.2 (ns)                  |
| OPN (stimuli: ConA)                                   | 0.1464 (ns)    | 0.2 (ns)                  |
| proliferation (stimuli: ConA)                         | 0.0114 (*)     | 0.0065 (**)               |

FIGURE 4B

| % T cell populations<br>(control vs adrenomedullin) | P value T-test | P value Mann-Whitney Test |
|-----------------------------------------------------|----------------|---------------------------|
| %CD4+IL17+                                          | 0.8866 (NS)    | 0.9087 (NS)               |
| %CD4+IFN+                                           | 0.0036 (**)    | 0.0063 (**)               |
| %CD4+IL4+                                           | <0.0001 (***)  | <0.0001 (***)             |
| %CD4+IL10+                                          | <0.0001 (***)  | <0.0001 (***)             |

FIGURE 4C

| serum autoantibodies<br>(control vs adrenomedullin) | P value T-test | P value Mann-Whitney Test |
|-----------------------------------------------------|----------------|---------------------------|
| IgG2a/IgG1                                          | 0.0005 (***)   | 0.0008 (***)              |

FIGURE 5A

| number CD4 T cell<br>(control vs adrenomedullin) | P value T test | P value Mann-Whitney Test |
|--------------------------------------------------|----------------|---------------------------|
| CD4 total                                        | 0.0001 (***)   | 0.0294 (*)                |
| Th1                                              | <0.0001 (***)  | 0.0286 (*)                |
| Th17                                             | 0.0009 (***)   | 0.0286 (*)                |

FIGURE 5B

| Cytokine<br>(control vs adrenomedullin) | P value T test | P value Mann-Whitney Test |
|-----------------------------------------|----------------|---------------------------|
| <b>Spinal cord</b>                      |                |                           |
| IL-17 (stimuli: MOG)                    | 0.0005 (***)   | 0.0179 (*)                |
| IFN $\gamma$ (stimuli: MOG)             | <0.0001 (***)  | 0.0179 (*)                |
| IL-2 (stimuli: MOG)                     | 0.0013 (**)    | 0.0179 (*)                |
| CXCL10 (stimuli: MOG)                   | 0.0001 (***)   | 0.0179 (*)                |
| <b>ConA</b>                             |                |                           |
| IL-17 (stimuli: ConA)                   | 0.0826 (ns)    | 0.0714 (ns)               |
| IFN $\gamma$ (stimuli: ConA)            | 0.2056 (ns)    | 0.3929 (ns)               |
| IL-2 (stimuli: ConA)                    | 0.0653 (ns)    | 0.0357 (*)                |
| CXCL10 (stimuli: ConA)                  | 0.0361 (*)     | 0.0179 (*)                |
| <b>Brain</b>                            |                |                           |
| IL-17 (stimuli: MOG)                    | 0.0025 (**)    | 0.0083 (**)               |
| IFN $\gamma$ (stimuli: MOG)             | 0.0651 (ns)    | 0.0083 (**)               |
| IL-2 (stimuli: MOG)                     | <0.0001 (***)  | 0.0083 (**)               |
| CXCL10 (stimuli: MOG)                   | 0.0030 (**)    | 0.0083 (**)               |
| <b>ConA</b>                             |                |                           |
| IL-17 (stimuli: ConA)                   | 0.1325 (ns)    | 0.1333 (ns)               |
| IFN $\gamma$ (stimuli: ConA)            | 0.0274 (*)     | 0.0917 (ns)               |
| IL-2 (stimuli: ConA)                    | 0.0541 (ns)    | 0.0583 (ns)               |
| CXCL10 (stimuli: ConA)                  | 0.0161 (*)     | 0.0083 (**)               |

FIGURE 6A

%CD25+Foxp3+IL10+  
(control vs adrenomedullin)

P-values

T test

Mann-Whitney Test

0.0004 (\*\*\*)

0.0238 (\*)

Number CD25+Foxp3+IL10+  
(control vs adrenomedullin)

0.0002 (\*\*\*)

0.0238 (\*)

FIGURE 6B

%brain Foxp3+ (control vs adrenomedullin)  
%spinal cord Foxp3+ (control vs adrenomedullin)

P value T test

0.0004 (\*\*\*)

0.0253 (\*)

Mann-Whitney Test

0.002 (\*\*)

0.0286 (\*)

FIGURE 6C, left graph

Groups for comparison

Untreated EAE vs Total T-cell control

Untreated EAE vs Total T-cell adrenomedullin

Total T-cell control vs Total T-cell adrenomedullin

One way ANOVA

ns

<0.0001 (\*\*\*)

<0.0001 (\*\*\*)

Kruskal-Wallis

ns

<0.01 (\*\*)

<0.0001 (\*\*\*)

Groups for comparison (day by day)

Untreated EAE vs Total T-cell control-D20

Untreated EAE vs Total T-cell adrenomedullin-D20

Total T-cell control vs Total T-cell adrenomedullin-D20

Untreated EAE vs Total T-cell control-D21

Untreated EAE vs Total T-cell adrenomedullin-D21

Total T-cell control vs Total T-cell adrenomedullin-D21

Untreated EAE vs Total T-cell control-D22

Untreated EAE vs Total T-cell adrenomedullin-D22

Total T-cell control vs Total T-cell adrenomedullin-D22

Untreated EAE vs Total T-cell control-D23

Untreated EAE vs Total T-cell adrenomedullin-D23

Total T-cell control vs Total T-cell adrenomedullin-D23

Untreated EAE vs Total T-cell control-D24

Untreated EAE vs Total T-cell adrenomedullin-D24

Total T-cell control vs Total T-cell adrenomedullin-D24

Untreated EAE vs Total T-cell control-D26

Untreated EAE vs Total T-cell adrenomedullin-D26

Total T-cell control vs Total T-cell adrenomedullin-D26

Untreated EAE vs Total T-cell control-D27

Untreated EAE vs Total T-cell adrenomedullin-D27

Total T-cell control vs Total T-cell adrenomedullin-D27

Untreated EAE vs Total T-cell control-D28

Untreated EAE vs Total T-cell adrenomedullin-D28

Total T-cell control vs Total T-cell adrenomedullin-D28

Untreated EAE vs Total T-cell control-D29

Untreated EAE vs Total T-cell adrenomedullin-D29

Total T-cell control vs Total T-cell adrenomedullin-D29

Untreated EAE vs Total T-cell control-D30

Untreated EAE vs Total T-cell adrenomedullin-D30

Total T-cell control vs Total T-cell adrenomedullin-D30

Untreated EAE vs Total T-cell control-D33

Untreated EAE vs Total T-cell adrenomedullin-D33

One way ANOVA

ns

<0.01 (\*\*)

<0.001 (\*\*\*)

ns

<0.001 (\*\*\*)

<0.001 (\*\*\*)

ns

<0.01 (\*\*)

<0.001 (\*\*\*)

ns

<0.01 (\*\*)

<0.01 (\*\*)

ns

<0.01 (\*\*)

<0.001 (\*\*\*)

ns

<0.001 (\*\*\*)

<0.001 (\*\*\*)

ns

<0.001 (\*\*\*)

<0.001 (\*\*\*)

ns

<0.001 (\*\*\*)

Kruskal-Wallis

ns

<0.01 (\*\*)

<0.01 (\*\*)

ns

<0.01 (\*\*)

<0.001 (\*\*\*)

<0.001 (\*\*\*)

ns

<0.001 (\*\*\*)

<0.001 (\*\*\*)

ns

<0.001 (\*\*\*)

<0.001 (\*\*\*)

ns

<0.01 (\*\*)

<0.001 (\*\*\*)

<0.001 (\*\*\*)

ns

<0.01 (\*\*)

<0.01 (\*\*)

ns

<0.01 (\*\*)

<0.001 (\*\*\*)

<0.001 (\*\*\*)

ns

<0.001 (\*\*\*)

<0.001 (\*\*\*)

ns

<0.001 (\*\*\*)

<0.001 (\*\*\*)

ns

<0.001 (\*\*\*)

|                                                         |              |              |
|---------------------------------------------------------|--------------|--------------|
| Total T-cell control vs Total T-cell adrenomedullin-D33 | <0.001 (***) | <0.001 (***) |
| Untreated EAE vs Total T-cell control-D35               | ns           | ns           |
| Untreated EAE vs Total T-cell adrenomedullin-D35        | <0.001 (***) | <0.001 (***) |
| Total T-cell control vs Total T-cell adrenomedullin-D35 | <0.001 (***) | <0.001 (***) |
| Untreated EAE vs Total T-cell control-D37               | ns           | ns           |
| Untreated EAE vs Total T-cell adrenomedullin-D37        | <0.01 (**)   | <0.01 (**)   |
| Total T-cell control vs Total T-cell adrenomedullin-D37 | <0.001 (***) | <0.001 (***) |
| Untreated EAE vs Total T-cell control-D41               | ns           | ns           |
| Untreated EAE vs Total T-cell adrenomedullin-D41        | <0.01 (**)   | <0.01 (**)   |
| Total T-cell control vs Total T-cell adrenomedullin-D41 | <0.01 (**)   | <0.01 (**)   |
| Untreated EAE vs Total T-cell control-D43               | ns           | ns           |
| Untreated EAE vs Total T-cell adrenomedullin-D43        | <0.01 (**)   | <0.01 (**)   |
| Total T-cell control vs Total T-cell adrenomedullin-D43 | <0.01 (**)   | <0.01 (**)   |
| Untreated EAE vs Total T-cell control-D47               | ns           | ns           |
| Untreated EAE vs Total T-cell adrenomedullin-D47        | <0.001 (***) | <0.001 (***) |
| Total T-cell control vs Total T-cell adrenomedullin-D47 | <0.001 (***) | <0.001 (***) |

FIGURE 6C, right graph

| Groups for comparison                                 | One way ANOVA | Kruskal-Wallis |
|-------------------------------------------------------|---------------|----------------|
| Untreated EAE vs CD25-depleted control                | ns            | ns             |
| Untreated EAE vs CD25-depleted adrenomedullin         | ns            | ns             |
| CD25-depleted control vs CD25-depleted adrenomedullin | ns            | ns             |

FIGURE 7A

| Cytokine<br>(+DCcontrol vs +DCadrenomedullin) | P value T test | P value Mann-Whitney Test |
|-----------------------------------------------|----------------|---------------------------|
| IFN $\gamma$ (stimuli: MOG)                   | 0.8802 (ns)    | 0.6579 (ns)               |
| IL-17 (stimuli: MOG)                          | <0.0001 (***)  | 0.0097 (**)               |
| IL-2 (stimuli: MOG)                           | <0.0001 (***)  | 0.0097 (**)               |
| IL10 (stimuli: MOG)                           | 1000 (ns)      | 0.6579 (ns)               |
| IFN $\gamma$ (stimuli: ConA)                  | 0.2160 (ns)    | 0.0765 (ns)               |
| IL-17 (stimuli: ConA)                         | 0.3880 (ns)    | 0.3758 (ns)               |
| IL-2 (stimuli: ConA)                          | 0.2929 (ns)    | 0.0765 (ns)               |
| IL10 (stimuli: ConA)                          | 0.7477 (ns)    | 0.6579 (ns)               |

FIGURE 7B

| Groups for comparison                  | One way ANOVA Test | Kruskal-Wallis Test |
|----------------------------------------|--------------------|---------------------|
| Untreated EAE vs DC control            | ns                 | ns                  |
| Untreated EAE vs DC adrenomedullin     | <0.0001 (***)      | <0.01 (**)          |
| DC control vs DC adrenomedullin        | <0.0001 (***)      | <0.01 (**)          |
| Groups for comparison (day by day)     | One way ANOVA Test | Kruskal-Wallis Test |
| Untreated EAE vs DC control-D15        | ns                 | ns                  |
| Untreated EAE vs DC adrenomedullin-D15 | <0.001 (***)       | <0.001 (***)        |
| DC control vs DC adrenomedullin-D15    | <0.05 (*)          | ns                  |
| Untreated EAE vs DC control-D17        | ns                 | ns                  |
| Untreated EAE vs DC adrenomedullin-D17 | <0.001 (***)       | <0.01 (**)          |
| DC control vs DC adrenomedullin-D17    | <0.001 (***)       | <0.001 (***)        |
| Untreated EAE vs DC control-D18        | ns                 | ns                  |
| Untreated EAE vs DC adrenomedullin-D18 | <0.001 (***)       | <0.01 (**)          |
| DC control vs DC adrenomedullin-D18    | <0.001 (***)       | <0.001 (***)        |
| Untreated EAE vs DC control-D19        | ns                 | ns                  |
| Untreated EAE vs DC adrenomedullin-D19 | <0.001 (***)       | <0.05 (*)           |
| DC control vs DC adrenomedullin-D19    | <0.001 (***)       | <0.001 (***)        |
| Untreated EAE vs DC control-D20        | ns                 | ns                  |
| Untreated EAE vs DC adrenomedullin-D20 | <0.001 (***)       | <0.001 (***)        |
| DC control vs DC adrenomedullin-D20    | <0.001 (***)       | <0.001 (***)        |
| Untreated EAE vs DC control-D21        | ns                 | ns                  |
| Untreated EAE vs DC adrenomedullin-D21 | <0.001 (***)       | <0.001 (***)        |
| DC control vs DC adrenomedullin-D21    | <0.01 (**)         | <0.001 (***)        |
| Untreated EAE vs DC control-D22        | ns                 | ns                  |
| Untreated EAE vs DC adrenomedullin-D22 | <0.001 (***)       | <0.001 (***)        |
| DC control vs DC adrenomedullin-D22    | <0.001 (***)       | <0.01 (**)          |
| Untreated EAE vs DC control-D24        | ns                 | ns                  |
| Untreated EAE vs DC adrenomedullin-D24 | <0.01 (**)         | <0.01 (**)          |
| DC control vs DC adrenomedullin-D24    | <0.01 (**)         | <0.01 (**)          |
| Untreated EAE vs DC control-D25        | ns                 | ns                  |
| Untreated EAE vs DC adrenomedullin-D25 | <0.05 (*)          | ns                  |
| DC control vs DC adrenomedullin-D25    | <0.01 (**)         | <0.05 (*)           |
| Untreated EAE vs DC control-D26        | ns                 | ns                  |
| Untreated EAE vs DC adrenomedullin-D26 | <0.05 (*)          | <0.05 (*)           |
| DC control vs DC adrenomedullin-D26    | <0.001 (***)       | <0.001 (***)        |
| Untreated EAE vs DC control-D27        | ns                 | ns                  |
| Untreated EAE vs DC adrenomedullin-D27 | <0.01 (**)         | <0.05 (*)           |
| DC control vs DC adrenomedullin-D27    | <0.001 (***)       | <0.001 (***)        |
| Untreated EAE vs DC control-D28        | ns                 | ns                  |

FIGURE 8A

| Cytokine<br>(LPS vs LPS+adrenomedullin) | P-value unpaired T Test | P value Mann-Whitney Test |
|-----------------------------------------|-------------------------|---------------------------|
| TNF $\alpha$ -astrocytes                | 0.0062 (**)             | 0.05 (*)                  |
| TNF $\alpha$ -microglia                 | 0.1370 (ns)             | 0.0906 (ns)               |
| TNF $\alpha$ -neuron-glia               | 0.0018 (**)             | 0.05 (*)                  |
| IL-6-astrocytes                         | 0.0109 (*)              | 0.0460 (*)                |
| IL-6-microglia                          | 0.0157 (*)              | 0.0383 (*)                |
| IL-6-neuron-glia                        | 0.0038 (**)             | 0.05 (*)                  |
| IL-12-astrocytes                        | 0.0418 (*)              | 0.05 (*)                  |
| IL-12-microglia                         | 0.0039 (**)             | 0.0383 (*)                |
| IL-12-neuron-glia                       | 0.0028 (**)             | 0.05 (*)                  |

FIGURE 8B

| Survival comparison<br>(H2O2 vs H2O2+adrenomedullin) | P-value unpaired T Test | P value Mann-Whitney Test |
|------------------------------------------------------|-------------------------|---------------------------|
| Precursor-oligodendrocytes                           | 0.0022 (**)             | 0.0031 (**)               |
| Mature-oligodendrocytes                              | 0.0163 (*)              | 0.0294 (*)                |

FIGURE 8C

| gene expression<br>(control vs adrenomedullin) | P-value unpaired T Test | P value Mann-Whitney Test |
|------------------------------------------------|-------------------------|---------------------------|
| ADNP                                           | 0.0084 (**)             | 0.0249 (*)                |
| BDNF                                           | 0.0047 (**)             | 0.0007 (***)              |

|                                        |              |              |
|----------------------------------------|--------------|--------------|
| Untreated EAE vs DC adrenomedullin-D28 | <0.05 (*)    | <0.05 (*)    |
| DC control vs DC adrenomedullin-D28    | <0.001 (***) | <0.001 (***) |
| Untreated EAE vs DC control-D29        | ns           | ns           |
| Untreated EAE vs DC adrenomedullin-D29 | <0.05 (*)    | <0.05 (*)    |
| DC control vs DC adrenomedullin-D29    | <0.01 (**)   | <0.01 (**)   |
| Untreated EAE vs DC control-D31        | ns           | ns           |
| Untreated EAE vs DC adrenomedullin-D31 | <0.01 (**)   | <0.01 (**)   |
| DC control vs DC adrenomedullin-D31    | <0.001 (***) | <0.001 (***) |
| Untreated EAE vs DC control-D32        | ns           | ns           |
| Untreated EAE vs DC adrenomedullin-D32 | <0.01 (**)   | <0.01 (**)   |
| DC control vs DC adrenomedullin-D32    | <0.001 (***) | <0.001 (***) |
| Untreated EAE vs DC control-D34        | ns           | ns           |
| Untreated EAE vs DC adrenomedullin-D34 | <0.01 (**)   | <0.01 (**)   |
| DC control vs DC adrenomedullin-D34    | <0.001 (***) | <0.001 (***) |
| Untreated EAE vs DC control-D36        | ns           | ns           |
| Untreated EAE vs DC adrenomedullin-D36 | <0.001 (***) | <0.001 (***) |
| DC control vs DC adrenomedullin-D36    | <0.001 (***) | <0.001 (***) |

FIGURE 9A

| Adrenomedullin (medium vs LPS) | P-value unpaired T Test | P value Mann-Whitney Test |
|--------------------------------|-------------------------|---------------------------|
| Astrocyte                      | 0.003 (**)              | 0.05 (*)                  |
| Microglia                      | 0.2089 (ns)             | 0.1509 (ns)               |

FIGURE 9B

| Adrenomedullin (naive vs EAE mice) | P-value unpaired T Test | P value Mann-Whitney Test |
|------------------------------------|-------------------------|---------------------------|
| brain                              | 0.014 (**)              | 0.0022 (**)               |
| spinal cord                        | 0.0155 (*)              | 0.0159 (*)                |
