# Supplementary material
Source: PubMed Central journal article supplement (PMC3951662)
Supplement: NIHMS552016-supplement-02.pdf [file NIHMS552016-supplement-02.pdf]

Supplementary Figure 1

| Cytokine/proliferation comparison<br>(+medium vs +adrenomedullin) | P value T test | P value Mann-Whitney Test |
|-------------------------------------------------------------------|----------------|---------------------------|
| IL-17 (unstimuli)                                                 | 0.1792 (ns)    | 0.5211 (ns)               |
| IFN $\gamma$ (unstimuli)                                          | 0.3287 (ns)    | 1.000 (ns)                |
| IL-2 (unstimuli)                                                  | 0.1792 (ns)    | 0.5211 (ns)               |
| CXCL10 (unstimuli)                                                | 0.1075 (ns)    | 0.1745 (ns)               |
| proliferation (unstimuli)                                         | 0.0065 (**)    | 0.0028 (**)               |
| IL-17 (stimuli: MOG)                                              | <0.0001 (***)  | <0.0001 (***)             |
| IFN $\gamma$ (stimuli: MOG)                                       | 0.0013 (**)    | 0.0029 (**)               |
| IL-2 (stimuli: MOG)                                               | <0.0001 (***)  | <0.0001 (***)             |
| CXCL10 (stimuli: MOG)                                             | 0.0340 (*)     | 0.0891 (ns)               |
| proliferation (stimuli: MOG)                                      | 0.0004 (***)   | 0.0091 (**)               |

Supplementary Figure 2

| Cytokine<br>(control vs adrenomedullin) | P value T test | P value Mann-Whitney Test |
|-----------------------------------------|----------------|---------------------------|
| <b>Spinal cord</b>                      |                |                           |
| IL-17 (unstimuli)                       | 0.7246 (ns)    | 0.8437 (ns)               |
| IFN $\gamma$ (unstimuli)                | 0.925 (ns)     | 0.5412 (ns)               |
| IL-2 (unstimuli)                        | 0.4828 (ns)    | 1.000 (ns)                |
| IL-17 (stimuli: MOG)                    | <0.0001 (***)  | 0.0079 (**)               |
| IFN $\gamma$ (stimuli: MOG)             | 0.1224 (ns)    | 0.0317 (*)                |
| IL-2 (stimuli: MOG)                     | <0.0001 (***)  | 0.0079 (**)               |
| <b>Brain</b>                            |                |                           |
| IL-17 (unstimuli)                       | 0.2545 (ns)    | 0.3360 (ns)               |
| IFN $\gamma$ (unstimuli)                | 0.1844 (ns)    | 0.3340 (ns)               |
| IL-2 (unstimuli)                        | 0.3371 (ns)    | 1.000 (ns)                |
| IL-17 (stimuli: MOG)                    | 0.0002 (***)   | 0.0006 (***)              |
| IFN $\gamma$ (stimuli: MOG)             | 0.4724 (ns)    | 0.2593 (ns)               |
| IL-2 (stimuli: MOG)                     | <0.0001 (***)  | 0.0006 (***)              |

Supplementary Figure 3

Surface markers and cytokines  
(LPS vs LPS+adrenomedullin)

P value T test

P value Mann-Whitney Test

|              |             |             |
|--------------|-------------|-------------|
| CD86         | 0.0819 (ns) | 0.1 (ns)    |
| CD80         | 0.0089 (**) | 0.0286 (*)  |
| CD40         | 0.0076 (**) | 0.0286 (*)  |
| TNF $\alpha$ | 0.0026 (**) | 0.0143 (*)  |
| IL-12        | 0.0018 (**) | 0.0286 (*)  |
| IL-6         | 0.0141 (*)  | 0.0295 (*)  |
| IFN $\gamma$ | 0.0519 (ns) | 0.0898 (ns) |
| IL-10        | 0.0133 (*)  | 0.0143 (*)  |
